# Supplementary material
Source: PubMed Central journal article supplement (PMC6219912)
Supplement: NIHMS1506720-supplement-1.pdf [file NIHMS1506720-supplement-1.pdf]

**Supplemental Information for Li et al. Titled “Helminth-Induced Production of TGFβ and Suppression of Graft-Versus-Host Disease Is Dependent on Interleukin-4 Production by Host Cells”**

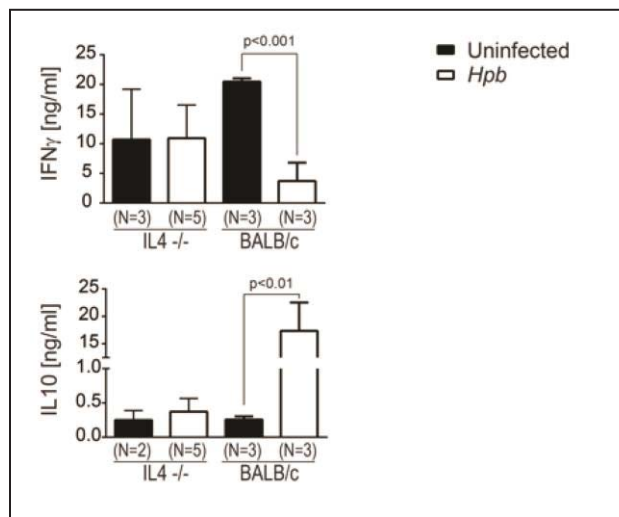

**Supplementary Figure 1. IL4 is necessary for helminth-induced modulation of MLN cell cytokine production.** IFN $\gamma$  and IL10 concentration in supernatants of anti-CD3/28-stimulated MLN cultures from *Hpb*-infected and uninfected 8-9 week old male IL4<sup>-/-</sup> or WT BALB/c mice, as measured by ELISA. Data show mean $\pm$ SD from  $\geq 2$  independent experiments, with each experiment containing multiple determinations (N indicates the number of independent determinations). P value between *Hpb*-infected vs. uninfected groups as indicated; differences between groups were determined by unpaired Welch’s t-test).
